# Supplementary material for: METALLOTHIONEIN genes encoding ROS scavenging enzymes are down-regulated in the root cortex during inducible aerenchyma formation in rice
Source: PubMed Central journal article supplement — Plant Signal Behav. 2017 Oct 16;12(11):e1388976. doi: 10.1080/15592324.2017.1388976 (PMC5703249; doi:10.1080/15592324.2017.1388976), 2017-10-16
Supplement: kpsb-12-11-1388976-s001.pdf [file kpsb-12-11-1388976-s001.pdf]

**Supplemental File 1.** List of primers used for qRT-PCR analysis

| Group            | Gene name    | RAP_Os IDs <sup>*1</sup> | MSU LOC_Os IDs <sup>*2</sup> | Forward                      | Reverse                      |
|------------------|--------------|--------------------------|------------------------------|------------------------------|------------------------------|
| Type 1           |              |                          |                              |                              |                              |
|                  | <i>MT1a</i>  | Os11g0704500             | LOC_Os11g47809               | 5'-TGCGGAAAGAAGTACCCTGA-3'   | 5'-TTCTCCGGCGCCACAC-3'       |
|                  | <i>MT1b</i>  | Os12g0570700             | LOC_Os12g38270               | 5'-CATTGATGCAATGGCTCCT-3'    | 5'-AGCTGACTCACACTGTGCGCA-3'  |
|                  | <i>MT1c</i>  | Os12g0571100             | LOC_Os12g38300               | 5'-TAAGGCCAAGGCGATCTATG-3'   | 5'-CATCATGTAGACAGGCTGGTG-3'  |
|                  | <i>MT1La</i> | Os03g0288000             | LOC_Os03g17870               | 5'-TGCAACTGCTAAGAAGCCATT-3'  | 5'-TGCATATGCCAGAGCAGATA-3'   |
|                  | <i>MT1Lb</i> | Os12g0567800             | LOC_Os12g38010               | 5'-GCTGAATCTGGTGAGGGT-3'     | 5'-TCAGACTGGAAGGGCTCTGT-3'   |
|                  | <i>MT1Lc</i> | Os12g0568200             | LOC_Os12g38051               | 5'-TGCAACTGCTAAAGGGGAAG-3'   | 5'-GCACACCAAATGGCTTCTTT-3'   |
|                  | <i>MT1Ld</i> | Os12g0568500             | LOC_Os12g38051               | 5'-GGCCAAGATGATCTATGACTGA-3' | 5'-TGTAGACAGGCTGGTGCATT-3'   |
|                  | <i>MT1Le</i> | Os12g0571000             | LOC_Os12g38290               | 5'-AACCCCTGCAACTGCTAAGA-3'   | 5'-CACAGATAGGCATGCTGGTG-3'   |
| Type 2           |              |                          |                              |                              |                              |
|                  | <i>MT2a</i>  | Os01g0149800             | LOC_Os01g05650               | 5'-CAGAGAACGGGTGCAAGTG-3'    | 5'-CTCCTTGTTTTCGTCAGGA-3'    |
|                  | <i>MT2b</i>  | Os05g0111300             | LOC_Os05g02070               | 5'-GCTGCTCCTGCAACTGAATC-3'   | 5'-GACAGTAGCAGCATCCATACGA-3' |
|                  | <i>MT2c</i>  | Os01g0974200             | LOC_Os01g74300               | 5'-CTTCCGGAGGATCAGAGATG-3'   | 5'-GTTGCAGTTGCAGCAGGAG-3'    |
|                  | <i>MT2La</i> | Os01g0149200             | LOC_Os01g05585               | 5'-TTCGCAAGCCATTTCAACCG-3'   | 5'-AGTCTCGTGGCGAAAGGTTT-3'   |
| Type 3           |              |                          |                              |                              |                              |
|                  | <i>MT3a</i>  | Os01g0200700             | LOC_Os01g10400               | 5'-CACCAGCTGCTCCTGCAC-3'     | 5'-TTCGGTTGCTTCGTGACTT-3'    |
|                  | <i>MT3b</i>  | Os05g0202800             | LOC_Os05g11320               | 5'-ACTGCGGCAAGTGATGAAC-3'    | 5'-CGCATAACGGATGACACACT-3'   |
| Type 4           |              |                          |                              |                              |                              |
|                  | <i>MT4</i>   | Os10g0542100             | LOC_Os10g39610               | 5'-GGCCACCACCTGATCCAT-3'     | 5'-CGCACGTACACACGCTTAAC-3'   |
| Internal control |              |                          |                              |                              |                              |
|                  | <i>TFIIE</i> | Os10g0397200             | LOC_Os10g25770               | 5'-GTGCAGCCCAAGGCTAAG-3'     | 5'-CGTCGAATAAGCGTAGAGCA-3'   |

<sup>\*1</sup> RAP Os IDs in Rice Annotation Project Database (RAP-DB; <http://rapdb.dna.affrc.go.jp/>).

<sup>\*2</sup> MSU LOC\_Os IDs in Rice Genome Annotation Project Database (<http://rice.plantbiology.msu.edu/>).
